# Supplementary material for: Sequence and gene content of a large fragment of a lizard sex chromosome and evaluation of candidate sex differentiating gene R-spondin 1
Source: PubMed Central journal article supplement (PMC3880147; doi:10.1186/1471-2164-14-899), 2013-12-17
Supplement: 1471-2164-14-899-S3.pdf [file 1471-2164-14-899-S3.pdf]

Consensus 1 10 20 30 40 50 60 70 80 90 100 110 120 130  
 CAACTGTGAGGACTGTTTCAGCCGAAACTTTTGCACAAAGTGAAGGAAGGTTTGTCTTGCACAAAGGAAGATGTTACGAAACCTGTCTGAGGGCTTCTCTGCTGCCAACGGCACGATGGAATGCAGCAGTCCGG

1. Pvi RSPO1 Ref 1 10 20 30 40 50 60 70 80 90 100 110 120 130  
 .....  
 Primer GF

2. BAC 100-O13 .....  
 3. BAC 215-D15 .....  
 4. Female 1 .....  
 5. Female 2 .....  
 6. Female 3 .....  
 7. Male 1 .....  
 8. Male 2 .....  
 9. Male 3 .....

Consensus 140 150 160 170 180 190 200 210 220 230 240 250 260 270  
 GTGAGTGTGGACACGAGGCAGCGAGGGTGGGGTGGG---NNGGTGGCGGTCTGTCTTCTGCTCTCTGCGGCCGGCCTGCCTACTCAGGTCCGCAGTTGGGTCCAGGGGCCATAAGGCAGGTCAGCTCGAC

1. Pvi RSPO1 Ref 140 150 160 170 176 186 196 206 216 226 236 246 256 266  
 .....-G.....T.....

2. BAC 100-O13 .....-G.....  
 3. BAC 215-D15 .....-G.....  
 4. Female 1 .....NNNN.....  
 5. Female 2 .....-----.....  
 6. Female 3 .....K.....-G.....  
 7. Male 1 .....-G.....  
 8. Male 2 .....-----R.....  
 9. Male 3 .....-----A.....

Consensus 280 290 300 310 320 330 340 350 360 370 380 390 400 410  
 AGGGTGCTTTCCAAGCCCTTCCCTGCCCAATGGCCCGAAAGGGCCAYCACGCTCTCCACGTTAGGAGCCTGACTTTCTGGAACYCCRCATCCCAGTGCCAGGGTCAGTTCGCAAGCTTGGCAGAAACAGGCTCAG

1. Pvi RSPO1 Ref 276 286 296 306 316 326 336 346 356 366 376 386 396 406  
 .....A.C.....C.G.....A.....

2. BAC 100-O13 .....C.G.....T.A.....  
 3. BAC 215-D15 .....C.G.....T.A.....  
 4. Female 1 .....R.....C.....R.....  
 5. Female 2 .....R.....C.....R.....  
 6. Female 3 .....C.....  
 7. Male 1 .....K.....C.A.....  
 8. Male 2 .....T.....C.....  
 9. Male 3 .....C.....R.....C.....Y.....A.....

420 430 440 450 460 470 480 490 500 510 520 530 540  
 Consensus TGGCAAGTTGACGTCTCTACGTGCGGCCAAAGCCAGCTCCAGAGGAGAYTTCTCAGGTTTCCTCCACGGGCTGCAGCATTTGTAAACCCCTGAGGTGCATTCTAGTTA-TCACGAAAGGTAGGGAGGAGTGAAG

416 426 436 446 456 466 476 486 496 506 516 525 535  
 1. Pvi RSPO1 Ref .....C.....G.....-.....

2. BAC 100-O13 .....T.....-.....  
 3. BAC 215-D15 .....T.....-.....  
 4. Female 1 .....C.....-.....  
 5. Female 2 .....Y.....C.....-.....  
 6. Female 3 .....K.....N.....  
 7. Male 1 .....C.....K.....-.....  
 8. Male 2 .....C.....-.....  
 9. Male 3 .....R.....R.....C.....K.....-.....

550 560 570 580 590 600 610 620 630 640 650 660 670 680  
 Consensus GAGATCTCCATTCTCTTGACAGGTCTGAAAACAAAGCACTGTACTCTGACTTTTAGAACTAGGAATGCTTGCAATTGATATCACTGGATTTTGCAACTCTTCAGAGCTGCACCTCTTAAAGAGCCATTTCCCCCAA

545 555 565 575 585 595 605 615 625 635 645 655 665 675  
 1. Pvi RSPO1 Ref .....T.....

2. BAC 100-O13 .....  
 3. BAC 215-D15 .....  
 4. Female 1 .....Y.....  
 5. Female 2 .....Y.....  
 6. Female 3 .....Y.....Y.....W.....  
 7. Male 1 .....Y.....  
 8. Male 2 .....  
 9. Male 3 .....C.....

690 700 710 720 730 740 750 760 770 780 790 800 810 820  
 Consensus ACTGAACCGGGCACACCAAAGTATTTCCCCAGCCGCATACGACATAAAGGGCGGGCAGCGTAAGGGGAGATATTCTAAACCGGGCAAGTGGGAGCGAGTCAGCGAGCATGCYTTTGTCTTCTTCTTCCCTCCCCG

685 695 705 715 725 735 745 755 765 775 785 795 805 815  
 1. Pvi RSPO1 Ref .....C.....T.....T.....

2. BAC 100-O13 .....C.....--  
 3. BAC 215-D15 .....C.....--  
 4. Female 1 .....K.....T.....  
 5. Female 2 .....M.....K.....T.....  
 6. Female 3 .....Y.....  
 7. Male 1 .....T.....  
 8. Male 2 .....Y.....T.....  
 9. Male 3 .....T.....

Consensus      830      840      850      860      870      880      890      900      910      920      930      940      948  
 --CCCCCCCAGCCCAATGTGAAATGAGCGAGTGGGGGCCGTGGGGCCCTTGCTCCAGAAGGAGAAAGCTGTGCGGCTTCCGGAAGGGCAACAAGGAGCGTTCCCGGTGGATCCTGCAGGTGATTT

1. Pvi RSPO1 Ref      823      833      843      853      863      873      883      893      903      913      923      941  
 -----C.

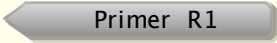

2. BAC 100-O13      -----  
 3. BAC 215-D15      -----  
 4. Female 1      -----Y-----  
 5. Female 2      -----Y-----  
 6. Female 3      -----Y-----Y-----  
 7. Male 1      -----  
 8. Male 2      -----  
 9. Male 3      NC-----C-----
